# Supplementary material for: A face recognition software framework based on principal component analysis
Source: PubMed Central journal article supplement (PMC8384131; doi:10.1371/journal.pone.0254965), 2021-07-22
Supplement: pone.0254965.s001.pdf [file pone.0254965.s001.pdf]

## Image Representation - Binarization

The functions `cvLoadImage()` and `cvtColor()` are integrated in OpenCV.

---

```
1 tmpImg = cvLoadImage(c);
2 tmpImgCopy = cvLoadImage(c);
3
4 Mat matTmpImgCopy(tmpImgCopy,0);
5 Mat frame_gray(matTmpImgCopy.rows, matTmpImgCopy.cols, matTmpImgCopy.depth
   ());
6 cvtColor( matTmpImgCopy, frame_gray, CV_BGR2GRAY );
7 tmpImgCopy2 = frame_gray;
```

---

## Image Representation - Normalization

The function `normalize()` is integrated in OpenCV.

---

```
1 Mat CPPPCA::normalize(const Mat& src) {
2     Mat srcnorm;
3     cv::normalize(src, srcnorm, 0, 255, NORM_MINMAX, CV_8UC1);
4     return srcnorm;
5
6 } // end of void CPPPCA::normalize()
```

---

## Face Detection

The parameter `strClassifierFileName` reads in the file path of the classifier file. Then function `detect_and_draw()` configures the classifier.

---

```
1 BOOL CPPPCA::FaceProc(IplImage* imgSource)
2 {
3     const char* strClassifierFileName = "";
4     static CvHaarClassifierCascade* cascade = 0;
5
6     cascade = (CvHaarClassifierCascade*)cvLoad(strClassifierFileName);
7
8     CvMemStorage* storage = cvCreateMemStorage(0);
9     detect_and_draw(imgSource, storage, cascade);
10
11     if(m_faces->total != 0){
12         m_FaceRect.x = (*(CvRect*)cvGetSeqElem(m_faces, 0)).x;
13         m_FaceRect.y = (*(CvRect*)cvGetSeqElem(m_faces, 0)).y;
14         m_FaceRect.width = (*(CvRect*)cvGetSeqElem(m_faces, 0)).width;
15         m_FaceRect.height = (*(CvRect*)cvGetSeqElem(m_faces, 0)).height;
16
17         cvClearMemStorage(storage);
18
19         return TRUE;
20     }
21     else
22     return FALSE;
23 } // end of void CPPPCA::FaceProc()
24
25 void CPPPCA::detect_and_draw(IplImage* img, CvMemStorage* storage,
26 CvHaarClassifierCascade* cascade)
27 {
28     static CvScalar colors[] =
29     {
30         {{0,0,255}},
31         {{0,128,255}},
```

```

32         {{0,255,255}},
33         {{0,255,0}},
34         {{255,128,0}},
35         {{255,255,0}},
36         {{255,0,0}},
37         {{255,0,255}}
38     };
39
40     double scale = 1;
41     IplImage* gray = cvCreateImage( cvSize( img->width, img->height), 8, 1 )
42     ;
43     IplImage* small_img = cvCreateImage( cvSize( cvRound (img->width/scale
44     ),
45     cvRound (img->height/scale)),
46     8, 1 );
47     int i;
48
49     cvResize( img, small_img, CV_INTER_LINEAR );
50     cvClearMemStorage( storage );
51
52     if( cascade )
53     {
54         double t = (double)cvGetTickCount();
55         m_faces = cvHaarDetectObjects( small_img, cascade, storage,
56         1.1, 2, 0,
57         cvSize(30, 30) );
58         t = (double)cvGetTickCount() - t;
59         printf( "detection time = %gms\n", t/((double)cvGetTickFrequency()
60         *1000.) );
61         for( i = 0; i < (m_faces ? m_faces->total : 0); i++)
62         {
63             CvRect* r = (CvRect*)cvGetSeqElem( m_faces, i );
64             CvPoint center;
65             int radius;
66             center.x = cvRound((r->x + r->width*0.5)*scale);
67             center.y = cvRound((r->y + r->height*0.5)*scale);
68             radius = cvRound((r->width + r->height)*0.25*scale);
69         }
70     }
71
72     cvReleaseImage( &gray );
73     cvReleaseImage( &small_img );
74 } // end of void CPPPCA::detect_and_draw()

```

---

## Pre-processing - Face Separation

The four Rect type parameters roi, eyesRoi, mouthRoi, NoseRoi define the face area, eyes area, mouth area, and nose area respectively.

```

1 Mat warp_dst = GetAffinedMat( tmpImgCopy2, frame_gray );
2
3 IplImage *imgLbpSrc = (&(IplImage)warp_dst);
4 IplImage *imgLbpDst = cvCreateImage( cvGetSize( imgLbpSrc ), IPL_DEPTH_8U, 1 )
5 ;
6 m_lbpInst.CreatLBP( imgLbpSrc, imgLbpDst );
7
8 Mat lbp_dst( imgLbpDst );
9
10 Rect roi( 51, 19, 80, 89 );
11 Mat matRoi = lbp_dst( roi );
12 m_vmatLbpFace.push_back( matRoi );

```

```

13
14 Rect eyesRoi(46, 22, 84, 38);
15 Mat matEyes = lbp_dst(eyesRoi);
16 m_vmatLbpEyes.push_back(matEyes);
17
18 Rect mouthRoi(69, 102, 38, 22);
19 Mat matMouth = lbp_dst(mouthRoi);
20 m_vmatLbpMouth.push_back(matMouth);
21
22 Rect NoseRoi(71, 57, 39, 37);
23 Mat matNose = lbp_dst(NoseRoi);
24 m_vmatLbpNose.push_back(matNose);

```

---

## Pre-processing - LBP

---

```

1 void CLBP::CreatLBP(IplImage *src, IplImage *dst)
2 {
3     int iTemp[8] = {0};
4     CvScalar s;
5
6     IplImage *ImgTemp = cvCreateImage(cvGetSize(src), IPL_DEPTH_8U, 1);
7     uchar *data = (uchar*)src->imageData;
8     int iStep = src->widthStep;
9
10    for (int i=1; i<src->height-1; i++)
11    for (int j=1; j<src->width-1; j++){
12
13        int sum=0;
14        if (data[(i-1)*iStep+j-1]>data[i*iStep+j])
15            iTemp[0]=1;
16        else
17            iTemp[0]=0;
18        if (data[i*iStep+(j-1)]>data[i*iStep+j])
19            iTemp[1]=1;
20        else
21            iTemp[1]=0;
22        if (data[(i+1)*iStep+(j-1)]>data[i*iStep+j])
23            iTemp[2]=1;
24        else
25            iTemp[2]=0;
26        if (data[(i+1)*iStep+j]>data[i*iStep+j])
27            iTemp[3]=1;
28        else
29            iTemp[3]=0;
30        if (data[(i+1)*iStep+(j+1)]>data[i*iStep+j])
31            iTemp[4]=1;
32        else
33            iTemp[4]=0;
34        if (data[i*iStep+(j+1)]>data[i*iStep+j])
35            iTemp[5]=1;
36        else
37            iTemp[5]=0;
38        if (data[(i-1)*iStep+(j+1)]>data[i*iStep+j])
39            iTemp[6]=1;
40        else
41            iTemp[6]=0;
42        if (data[(i-1)*iStep+j]>data[i*iStep+j])
43            iTemp[7]=1;
44        else
45            iTemp[7]=0;
46        s.val[0] = (iTemp[0]*1+iTemp[1]*2+iTemp[2]*4+iTemp[3]*8+iTemp
47            [4]*16+iTemp[5]*32+iTemp[6]*64+iTemp[7]*128);

```

```

48         cvSet2D(dst, i, j, s);
49     }
50 }
51 }
52 } // end of CLBP::CreatLBP()

```

---

## PCA

The function `InitPCA()` sets up the PCA instance for further use. The function `GetEigenValues()` obtains the eigenvalue of a corresponding eigenvector.

```

1 void CPPPCA::InitPCA(String strDirName, Mat matSrc, vector<Mat> vmatSrc)
2 {
3     double dbnumber_principal_compent = 0.95;
4     Mat pcaImg, projectImg;
5
6     PCA pca(matSrc, Mat(), CV_PCA_DATA_AS_COL, dbnumber_principal_compent)
7     ;
8     Mat EigenVectors = pca.eigenvectors;
9
10    pcaImg = normalize(pca.eigenvectors.row(0)).reshape(1, vmatSrc[0].rows
11    );
12    //    pcaFace = pca.eigenvectors.row(0).reshape(1, src[0].rows);
13    imwrite(("\\") + strDirName + ("\\Pca.jpg"), pcaImg);
14
15    Mat EigenValues = pca.eigenvalues;
16
17    Mat dst;
18    dst = pca.project(matSrc.col(0));
19    projectImg = normalize(pca.backProject(dst).col(0)).reshape(1, vmatSrc
20    [0].rows);
21    imwrite(("") + strDirName + ("\\Project.jpg"), projectImg);
22
23    m_pcaTrain = pca;
24 } // end of CPPPCA::InitPCA()
25
26 void CPPPCA::GetEigenValues(String strDirName, Mat matSrc, vector<Mat>
27 vmatSrc, int iImgNum)
28 {
29     string strInt;
30     Mat dst, projectImg;
31     const string strEigenValue = "D:\\Summer Project\\EigenValue\\
32     FaceEigenValues.xml";
33     FileStorage fs(strEigenValue, FileStorage::WRITE);
34
35     for(int i = 0; i < iImgNum; i++){
36         strInt = inttostring(i);
37         dst = m_pcaTrain.project(matSrc.col(i));
38
39         //    projectImg = normalize(m_pcaTrain.backProject(dst).col
40         //    (0)).reshape(1, vmatSrc[0].rows);
41         //    imwrite(("D:\\Summer Project\\") + strDirName + ("\\
42         Project") + strInt + (.jpg)), projectImg);
43         fs << "eigenvalue" + strInt << dst;
44     }
45     fs.release();
46 } // end of CPPPCA::GetEigenValues()

```

---

## Face Representation - Gabor Wavelet

The function WDT() implements Wavelet transformation. The function IWDT() implements inverse Wavelet transformation. The function Wavelet() generates different types of Wavelet. Currently only haar and sym2 Wavelet are implemented. The function WaveletDecompose() implements Wavelet decomposition. The function WaveletReconstruct() implements Wavelet reconstruction.

```
1 Mat WDT( const Mat &_src , const string _wname, const int _level )const
2 {
3     int reValue = THID_ERR_NONE;
4     Mat src = Mat_<float>(_src);
5     Mat dst = Mat::zeros( src.rows , src.cols , src.type() );
6     int N = src.rows;
7     int D = src.cols;
8
9     Mat lowFilter;
10    Mat highFilter;
11    wavelet( _wname, lowFilter , highFilter );
12
13    int t=1;
14    int row = N;
15    int col = D;
16
17    while( t<=_level )
18    {
19        for( int i=0; i<row; i++ )
20        {
21            Mat oneRow = Mat::zeros( 1,col , src.type() );
22            for ( int j=0; j<col; j++ )
23            {
24                oneRow.at<float>(0,j) = src.at<float>(i,j);
25            }
26            oneRow = waveletDecompose( oneRow, lowFilter , highFilter );
27            for ( int j=0; j<col; j++ )
28            {
29                dst.at<float>(i,j) = oneRow.at<float>(0,j);
30            }
31        }
32
33        #if 0
34        //normalize( dst , dst , 0 , 255, NORM_MINMAX );
35        IplImage dstImg1 = IplImage(dst);
36        cvSaveImage( "dst.jpg" , &dstImg1 );
37        #endif
38        for ( int j=0; j<col; j++ )
39        {
40            Mat oneCol = Mat::zeros( row , 1 , src.type() );
41            for ( int i=0; i<row; i++ )
42            {
43                oneCol.at<float>(i,0) = dst.at<float>(i,j);
44            }
45            oneCol = ( waveletDecompose( oneCol.t() , lowFilter , highFilter
46                ) ).t();
47
48            for ( int i=0; i<row; i++ )
49            {
50                dst.at<float>(i,j) = oneCol.at<float>(i,0);
51            }
52        }
53
54        #if 0
55        //normalize( dst , dst , 0 , 255, NORM_MINMAX );
56        IplImage dstImg2 = IplImage(dst);
57        cvSaveImage( "dst.jpg" , &dstImg2 );
```

```

57         #endif
58
59         row /= 2;
60         col /=2;
61         t++;
62         src = dst;
63     }
64
65     return dst;
66 }
67 Mat IWDT( const Mat &_src , const string _wname , const int _level )const
68 {
69     int reValue = THID_ERR_NONE;
70     Mat src = Mat<float>(_src);
71     Mat dst = Mat::zeros( src.rows , src.cols , src.type() );
72     int N = src.rows;
73     int D = src.cols;
74
75     Mat lowFilter;
76     Mat highFilter;
77     wavelet( _wname , lowFilter , highFilter );
78
79     int t=1;
80     int row = N/std::pow( 2. , _level -1);
81     int col = D/std::pow(2. , _level -1);
82
83     while ( row<=N && col<=D )
84     {
85         for ( int j=0; j<col; j++ )
86         {
87             Mat oneCol = Mat::zeros( row , 1 , src.type() );
88             for ( int i=0; i<row; i++ )
89             {
90                 oneCol.at<float>(i,0) = src.at<float>(i,j);
91             }
92             oneCol = ( waveletReconstruct( oneCol.t(), lowFilter ,
93                                     highFilter ) ).t();
94
95             for ( int i=0; i<row; i++ )
96             {
97                 dst.at<float>(i,j) = oneCol.at<float>(i,0);
98             }
99         }
100         #if 0
101         //normalize( dst , dst , 0 , 255 , NORMLMINMAX );
102         IplImage dstImg2 = IplImage(dst);
103         cvSaveImage( "dst.jpg" , &dstImg2 );
104         #endif
105         for( int i=0; i<row; i++ )
106         {
107             Mat oneRow = Mat::zeros( 1,col , src.type() );
108             for ( int j=0; j<col; j++ )
109             {
110                 oneRow.at<float>(0,j) = dst.at<float>(i,j);
111             }
112             oneRow = waveletReconstruct( oneRow , lowFilter , highFilter );
113             for ( int j=0; j<col; j++ )
114             {
115                 dst.at<float>(i,j) = oneRow.at<float>(0,j);
116             }
117         }
118         #if 0
119         //normalize( dst , dst , 0 , 255 , NORMLMINMAX );
120         IplImage dstImg1 = IplImage(dst);
121

```

```

122         cvSaveImage( "dst.jpg", &dstImg1 );
123     #endif
124
125     row *= 2;
126     col *= 2;
127     src = dst;
128 }
129
130     return dst;
131 }
132 void wavelet( const string _wname, Mat &_lowFilter, Mat &_highFilter )
133     const
134 {
135     if ( _wname=="haar" || _wname=="db1" )
136     {
137         int N = 2;
138         _lowFilter = Mat::zeros( 1, N, CV_32F );
139         _highFilter = Mat::zeros( 1, N, CV_32F );
140
141         _lowFilter.at<float>(0, 0) = 1/sqrtf(N);
142         _lowFilter.at<float>(0, 1) = 1/sqrtf(N);
143
144         _highFilter.at<float>(0, 0) = -1/sqrtf(N);
145         _highFilter.at<float>(0, 1) = 1/sqrtf(N);
146     }
147     if ( _wname == "sym2" )
148     {
149         int N = 4;
150         float h[] = { -0.483, 0.836, -0.224, -0.129 };
151         float l[] = { -0.129, 0.224, 0.837, 0.483 };
152
153         _lowFilter = Mat::zeros( 1, N, CV_32F );
154         _highFilter = Mat::zeros( 1, N, CV_32F );
155
156         for ( int i=0; i<N; i++ )
157         {
158             _lowFilter.at<float>(0, i) = l[i];
159             _highFilter.at<float>(0, i) = h[i];
160         }
161     }
162 }
163 Mat waveletDecompose( const Mat &_src, const Mat &_lowFilter, const Mat &
164     _highFilter )const
165 {
166     assert( _src.rows==1 && _lowFilter.rows==1 && _highFilter.rows==1 );
167     assert( _src.cols>=_lowFilter.cols && _src.cols>=_highFilter.cols );
168     Mat &src = Mat_<float>(_src);
169
170     int D = src.cols;
171
172     Mat &lowFilter = Mat_<float>(_lowFilter);
173     Mat &highFilter = Mat_<float>(_highFilter);
174
175     Mat dst1 = Mat::zeros( 1, D, src.type() );
176     Mat dst2 = Mat::zeros( 1, D, src.type() );
177
178     filter2D( src, dst1, -1, lowFilter );
179     filter2D( src, dst2, -1, highFilter );
180
181     Mat downDst1 = Mat::zeros( 1, D/2, src.type() );
182     Mat downDst2 = Mat::zeros( 1, D/2, src.type() );
183
184     resize( dst1, downDst1, downDst1.size() );
185     resize( dst2, downDst2, downDst2.size() );

```

```

186     for ( int i=0; i<D/2; i++ )
187     {
188         src.at<float>(0, i) = downDst1.at<float>( 0, i );
189         src.at<float>(0, i+D/2) = downDst2.at<float>( 0, i );
190     }
191     return src;
192 }
193 }
194 Mat waveletReconstruct( const Mat &_src , const Mat &_lowFilter , const Mat
&_highFilter )const
195 {
196     assert( _src.rows==1 && _lowFilter.rows==1 && _highFilter.rows==1 );
197     assert( _src.cols>=_lowFilter.cols && _src.cols>=_highFilter.cols );
198     Mat &src = Mat_<float>(_src);
199
200     int D = src.cols;
201
202     Mat &lowFilter = Mat_<float>(_lowFilter);
203     Mat &highFilter = Mat_<float>(_highFilter);
204
205     Mat Up1 = Mat::zeros( 1, D, src.type() );
206     Mat Up2 = Mat::zeros( 1, D, src.type() );
207
208     Mat roi1( src , Rect(0, 0, D/2, 1) );
209     Mat roi2( src , Rect(D/2, 0, D/2, 1) );
210     resize( roi1 , Up1 , Up1.size() , 0, 0, INTER_CUBIC );
211     resize( roi2 , Up2 , Up2.size() , 0, 0, INTER_CUBIC );
212
213     Mat dst1 = Mat::zeros( 1, D, src.type() );
214     Mat dst2= Mat::zeros( 1, D, src.type() );
215     filter2D( Up1, dst1, -1, lowFilter );
216     filter2D( Up2, dst2, -1, highFilter );
217
218     dst1 = dst1 + dst2;
219
220     return dst1;
221 }

```

---

## Face Detection

The parameter params contains all set up information of the BP network. The parameter layerSizes stands for the number of layers in the network. Here, the network has three hidden layers with an input layer and an output layer. The function predict() enables predicting new nodes in the network.

```

1 int main()
2 {
3     CvANN_MLP bp;
4     CvANN_MLP_TrainParams params;
5
6     params.train_method=CvANN_MLP_TrainParams::BACKPROP;
7     params.bp_dw_scale=0.1;
8     params.bp_moment_scale=0.1;
9     float labels[3][5] = {{0,0,0,0,0},{1,1,1,1,1},{0,0,0,0,0}};
10    Mat labelsMat(3, 5, CV_32FC1, labels);
11
12    float trainingData[3][5] = { {1,2,3,4,5},{111,112,113,114,115},
    {21,22,23,24,25} };
13    Mat trainingDataMat(3, 5, CV_32FC1, trainingData);
14    Mat layerSizes=(Mat_<int>(1,5) << 5,2,2,2,5);
15    bp.create(layerSizes,CvANN_MLP::SIGMOID_SYM);//CvANN_MLP::SIGMOID_SYM
16    //CvANN_MLP::GAUSSIAN
17    //CvANN_MLP::IDENTITY

```



```

18 bp.train(trainingDataMat, labelsMat, Mat(),Mat(), params);
19
20
21 int width = 512, height = 512;
22 Mat image = Mat::zeros(height, width, CV_8UC3);
23 Vec3b green(0,255,0), blue (255,0,0);
24
25 for (int i = 0; i < image.rows; ++i)
26 for (int j = 0; j < image.cols; ++j)
27 {
28     Mat sampleMat = (Mat_<float >(1,5) << i,j,0,0,0);
29     Mat responseMat;
30     bp.predict(sampleMat, responseMat);
31     float* p=responseMat.ptr<float>(0);
32     float response=0.0f;
33     for (int k=0;k<5;i++){
34         // cout<<p[k]<<" ";
35         response+=p[k];
36     }
37     if (response >2)
38         image.at<Vec3b>(j, i) = green;
39     else
40         image.at<Vec3b>(j, i) = blue;
41 }
42
43 // Show the training data
44 int thickness = -1;
45 int lineType = 8;
46 circle( image, Point(501, 10), 5, Scalar( 0, 0, 0), thickness,
47         lineType);
48 circle( image, Point(255, 10), 5, Scalar(255, 255, 255), thickness,
49         lineType);
50 circle( image, Point(501, 255), 5, Scalar(255, 255, 255), thickness,
51         lineType);
52 circle( image, Point( 10, 501), 5, Scalar(255, 255, 255), thickness,
53         lineType);
54
55 imwrite("result.png", image); // save the image
56
57 imshow("BP Simple Example", image); // show it to the user
58 waitKey(0);
59 }

```

---

## PCA - Kernel PCA

The function `kernel()` works as a switch of two types of mainstream kernels, which are RBF and Polynomial. The function `run_pca()` implements all main steps of kernel PCA which are calculating the kernel matrix, centering the kernel matrix, and obtaining eigenvectors and eigenvalues.

---

```

1 void PCA::load_data(const char* data, char sep){
2
3     unsigned int row = 0;
4     ifstream file(data);
5     if(file.is_open()){
6         string line, token;
7         while(getline(file, line)){
8             stringstream tmp(line);
9             unsigned int col = 0;
10            while(getline(tmp, token, sep)){
11                if(X.rows() < row+1){
12                    X.conservativeResize(row+1,X.cols());

```

```

13         }
14         if(X.cols() < col+1){
15             X.conservativeResize(X.rows(),col+1);
16         }
17         X(row,col) = atof(token.c_str());
18         col++;
19     }
20     row++;
21 }
22 file.close();
23 Xcentered.resize(X.rows(),X.cols());
24 }else{
25     cout << "Failed to read file " << data << endl;
26 }
27 }
28 }
29
30 double PCA::kernel(const VectorXd& a, const VectorXd& b){
31
32
33     switch(kernel_type){
34         case 2 :
35             return pow(a.dot(b)+constant,order);
36         default :
37             return (exp(-gamma*((a-b).squaredNorm())));
38     }
39 }
40 }
41
42 void PCA::run_kpca(){
43
44     K.resize(X.rows(),X.rows());
45     for(unsigned int i = 0; i < X.rows(); i++){
46         for(unsigned int j = i; j < X.rows(); j++){
47             K(i,j) = K(j,i) = kernel(X.row(i),X.row(j));
48             //printf("k(%i,%i) = %f\n",i,j,K(i,j));
49         }
50     }
51     EigenSolver<MatrixXd> edecomp(K);
52     eigenvalues = edecomp.eigenvalues().real();
53     eigenvectors = edecomp.eigenvectors().real();
54     cumulative.resize(eigenvalues.rows());
55     vector<pair<double,VectorXd>> eigen_pairs;
56     double c = 0.0;
57     for(unsigned int i = 0; i < eigenvectors.cols(); i++){
58         if(normalise){
59             double norm = eigenvectors.col(i).norm();
60             eigenvectors.col(i) /= norm;
61         }
62         eigen_pairs.push_back(make_pair(eigenvalues(i),eigenvectors.col(i)
63     ));
64     }
65     sort(eigen_pairs.begin(),eigen_pairs.end(), [](const pair<double,
66     VectorXd> a, const pair<double,VectorXd> b) -> bool {return (a.
67     first > b.first);});
68     for(unsigned int i = 0; i < eigen_pairs.size(); i++){
69         eigenvalues(i) = eigen_pairs[i].first;
70         c += eigenvalues(i);
71         cumulative(i) = c;
72         eigenvectors.col(i) = eigen_pairs[i].second;
73     }
74     transformed.resize(X.rows(),components);
75     for(unsigned int i = 0; i < X.rows(); i++){
76         for(unsigned int j = 0; j < components; j++){

```

```

76         for (int k = 0; k < K.rows(); k++){
77             transformed(i,j) += K(i,k) * eigenvectors(k,j);
78         }
79     }
80 }
81 cout << "Sorted eigenvalues:" << endl;
82 for(unsigned int i = 0; i < eigenvalues.rows(); i++){
83     if(eigenvalues(i) > 0){
84         cout << "PC " << i+1 << ": Eigenvalue: " << eigenvalues(i);
85         printf("\t(%3.3f of variance, cumulative = %3.3f)\n",
            eigenvalues(i)/eigenvalues.sum(),cumulative(i)/eigenvalues
            .sum());
86     }
87 }
88 cout << endl;
89 //cout << "Sorted eigenvectors:" << endl << eigenvectors << endl <<
    endl;
90 //cout << "Transformed data:" << endl << transformed << endl << endl;
91 }
92
93
94 void PCA::print () {
95
96     cout << "Input data:" << endl << X << endl << endl;
97     cout << "Centered data:" << endl << Xcentered << endl << endl;
98     cout << "Covariance matrix:" << endl << C << endl << endl;
99     cout << "Eigenvalues:" << endl << eigenvalues << endl << endl;
100    cout << "Eigenvectors:" << endl << eigenvectors << endl << endl;
101    cout << "Sorted eigenvalues:" << endl;
102    for(unsigned int i = 0; i < eigenvalues.rows(); i++){
103        if(eigenvalues(i) > 0){
104            cout << "PC " << i+1 << ": Eigenvalue: " << eigenvalues(i);
105            printf("\t(%3.3f of variance, cumulative = %3.3f)\n",
                eigenvalues(i)/eigenvalues.sum(),cumulative(i)/eigenvalues
                .sum());
106        }
107    }
108    cout << endl;
109    cout << "Sorted eigenvectors:" << endl << eigenvectors << endl << endl
        ;
110    cout << "Transformed data:" << endl << X * eigenvectors << endl <<
        endl;
111    //cout << "Transformed centred data:" << endl << transformed << endl
        << endl;
112
113 }
114
115 void PCA::write_transformed(string file){
116
117     ofstream outfile(file);
118     for(unsigned int i = 0; i < transformed.rows(); i++){
119         for(unsigned int j = 0; j < transformed.cols(); j++){
120             outfile << transformed(i,j);
121             if(j != transformed.cols()-1) outfile << ",";
122         }
123         outfile << endl;
124     }
125     outfile.close();
126     cout << "Written file " << file << endl;
127
128 }
129
130 void PCA::write_eigenvectors(string file){
131
132     ofstream outfile(file);
133     for(unsigned int i = 0; i < eigenvectors.rows(); i++){

```

```

134         for(unsigned int j = 0; j < eigenvectors.cols(); j++){
135             outfile << eigenvectors(i,j);
136             if(j != eigenvectors.cols()-1) outfile << ", ";
137         }
138         outfile << endl;
139     }
140     outfile.close();
141     cout << "Written file " << file << endl;
142
143 }

```

---

## Verification - Mahalanobis Distance

The function calcCovarMatrix() calculates the covariance matrix between two vectors. The calculation function cvMahalonobis() is integrated in OpenCV.

```

1 double CPPPCA::CalMahDistance(Mat matSrc, Mat matTest)
2 {
3     Mat matCovar, matMean;
4     CvMat cvmatSrc, cvmatTest, cvmatCovar;
5     cvmatSrc = matSrc;
6     cvmatTest = matTest;
7
8     calcCovarMatrix(&matSrc, 1, matCovar, matMean, CV_COVAR_NORMAL);
9     cvmatCovar = matCovar;
10
11     double dbMahDistance = cvMahalonobis(&cvmatSrc, &cvmatTest, &
12         cvmatCovar);
13
14     return dbMahDistance;
15 } // end of CPPPCA::CalMahDistance()

```

---

## Verification - Correlation

```

1 double CPPPCA::GetCorelation(uchar *v1, uchar *v2, int n)
2 {
3     double dSignal = 0, dNoise = 0;
4     int i;
5     double e1 = 0, e2 = 0, e12 = 0, c1 = 0, c2 = 0;
6
7     //calculate the expectations of V1, V2 and V1 x V2
8     for (i = 0; i < n; i++){
9         e1 += v1[i];
10        e2 += v2[i];
11        e12 += v1[i] * v2[i];
12    }
13
14    e1 = e1 / n;
15    e2 = e2 / n;
16    e12 = e12 / n;
17
18    //calculate the variances of R1 and R2
19    for (i = 0; i < n; i++){
20        c1 += (e1 - v1[i]) * (e1 - v1[i]);
21        c2 += (e2 - v2[i]) * (e2 - v2[i]);
22    }
23
24    c1 = sqrt(c1 / n);
25    c2 = sqrt(c2 / n);

```

```
26
27 //calculate the correlation
28 return IsZero(c1) || IsZero(c2)? 0.0 : fabs((e12 - e1 * e2) / (c1 * c2
    ));
29
30 } //end of CPPPCA::GetCorelation()
```

---
